# Supplementary material for: A novel hollow capsule-like recyclable functional ZnO/C/Fe3O4 endowed with three-dimensional oriented recognition ability for selectively photodegrading danofloxacin mesylate
Source: Royal Society of Chemistry journal article supplement (doi:10.1039/c6cy00927a), 2016-01-01
Supplement: c6cy00927a1.pdf [file c6cy00927a1.pdf]

## Electronic Supplementary Information

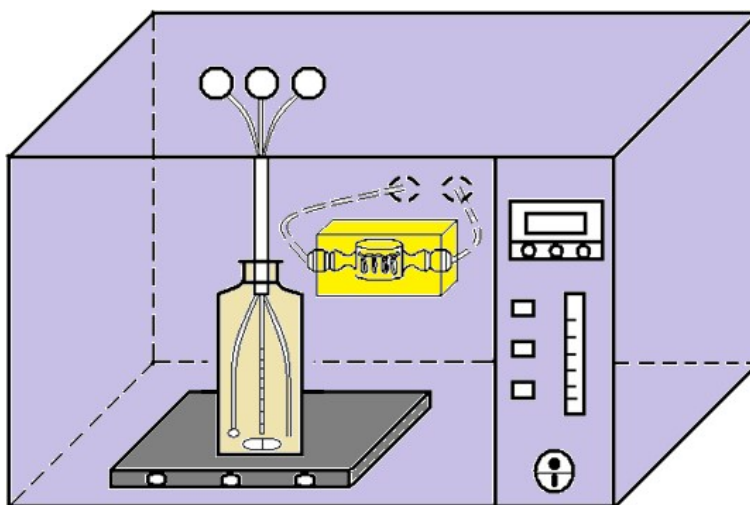

**Fig. S1** The photocatalytic reactor.

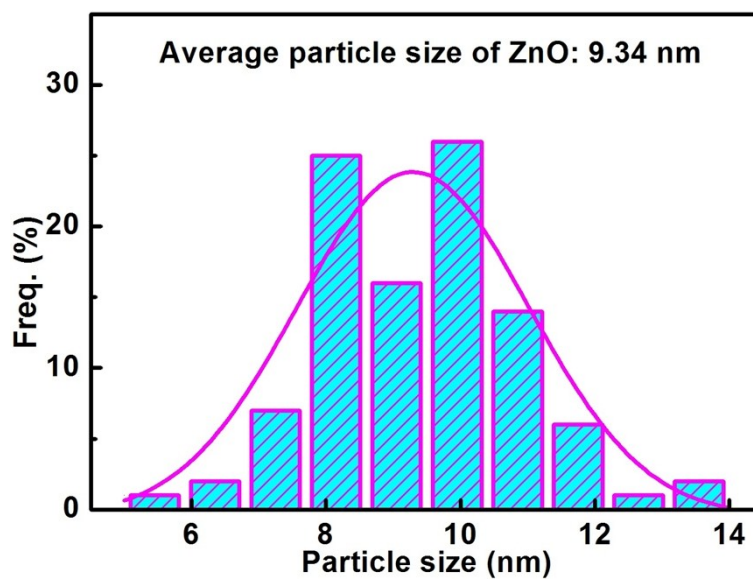

**Fig. S2** The particle size distribution of ZnO in functional ZnO/C/Fe<sub>3</sub>O<sub>4</sub>.

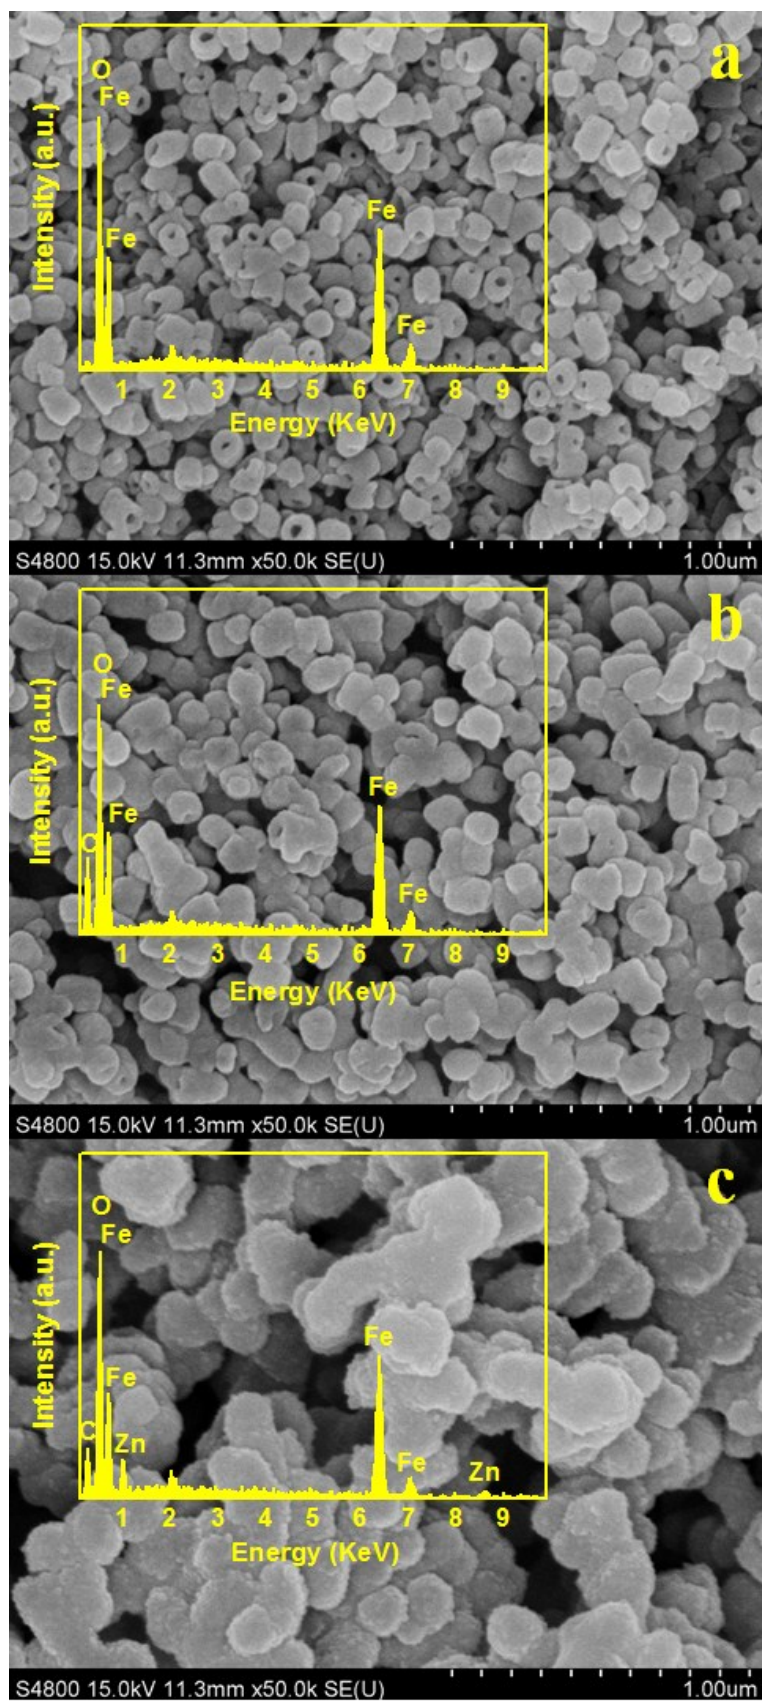

**Fig. S3** SEM images and EDS spectra (inset) of  $\text{Fe}_3\text{O}_4$  (a),  $\text{C}/\text{Fe}_3\text{O}_4$  (b) and functional  $\text{ZnO}/\text{C}/\text{Fe}_3\text{O}_4$  (c).

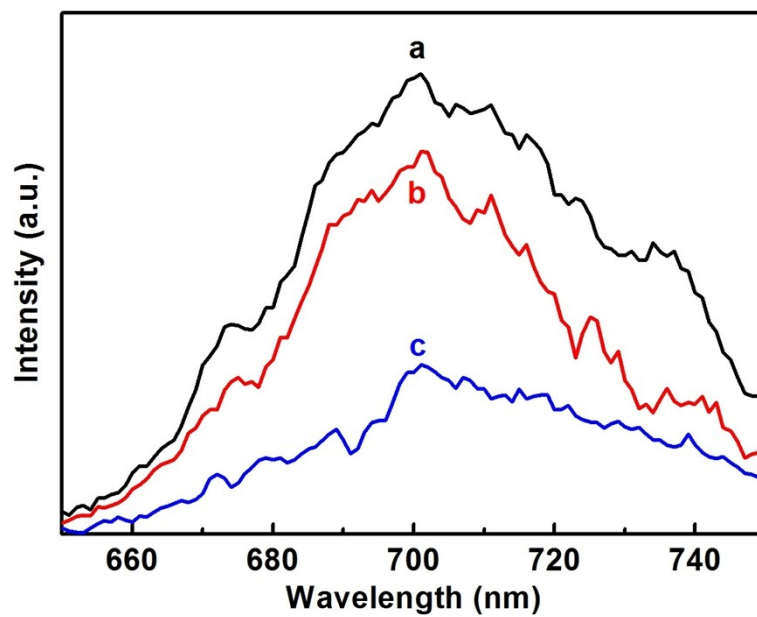

**Fig. S4** PL spectra of ZnO (a), ZnO/Fe<sub>3</sub>O<sub>4</sub> (b) and functional ZnO/C/Fe<sub>3</sub>O<sub>4</sub> (c).

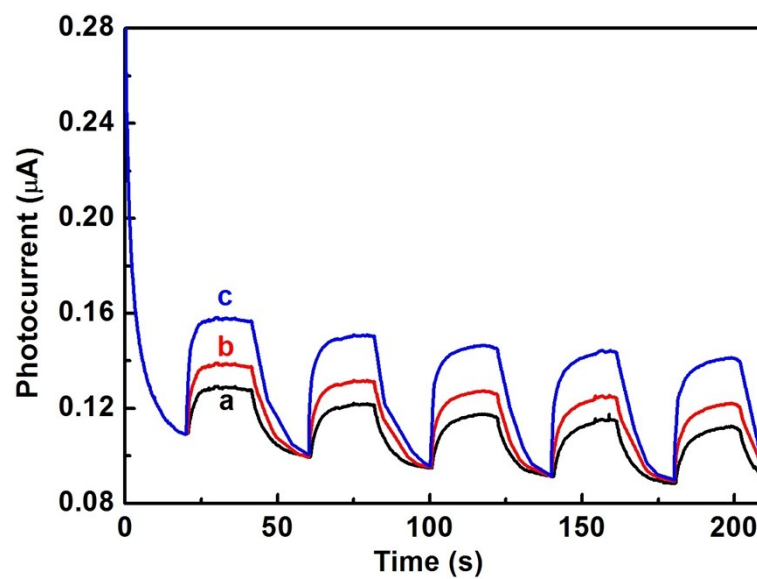

**Fig. S5** Transient photocurrent response curves of ZnO (a), ZnO/Fe<sub>3</sub>O<sub>4</sub> (b) and functional ZnO/C/Fe<sub>3</sub>O<sub>4</sub> (c) under visible light irradiation.

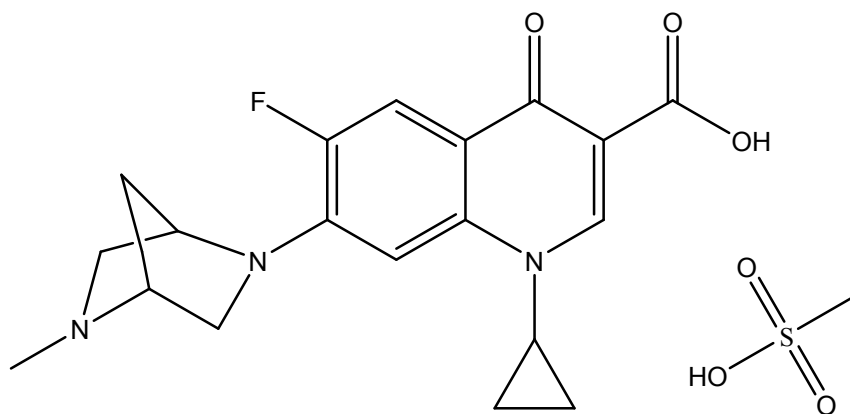

**Danofloxacin mesylate (DM)**

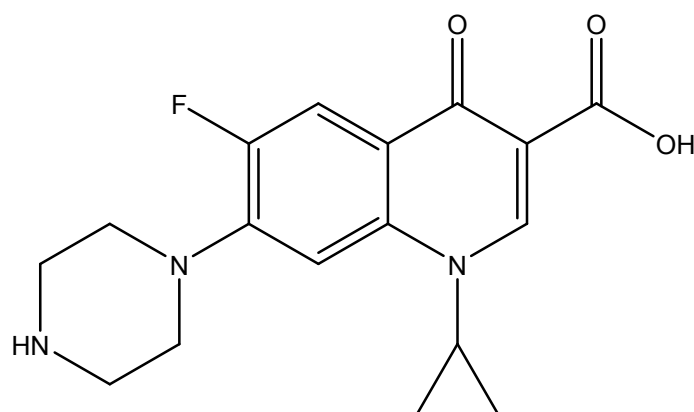

**Ciprofloxacin (CIP)**

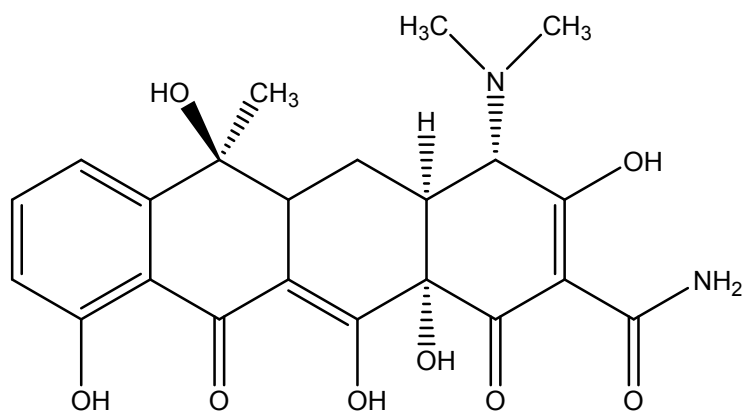

**Tetracycline (TC)**

**Fig. S6** The molecular structures of danofloxacin mesylate, ciprofloxacin and tetracycline.

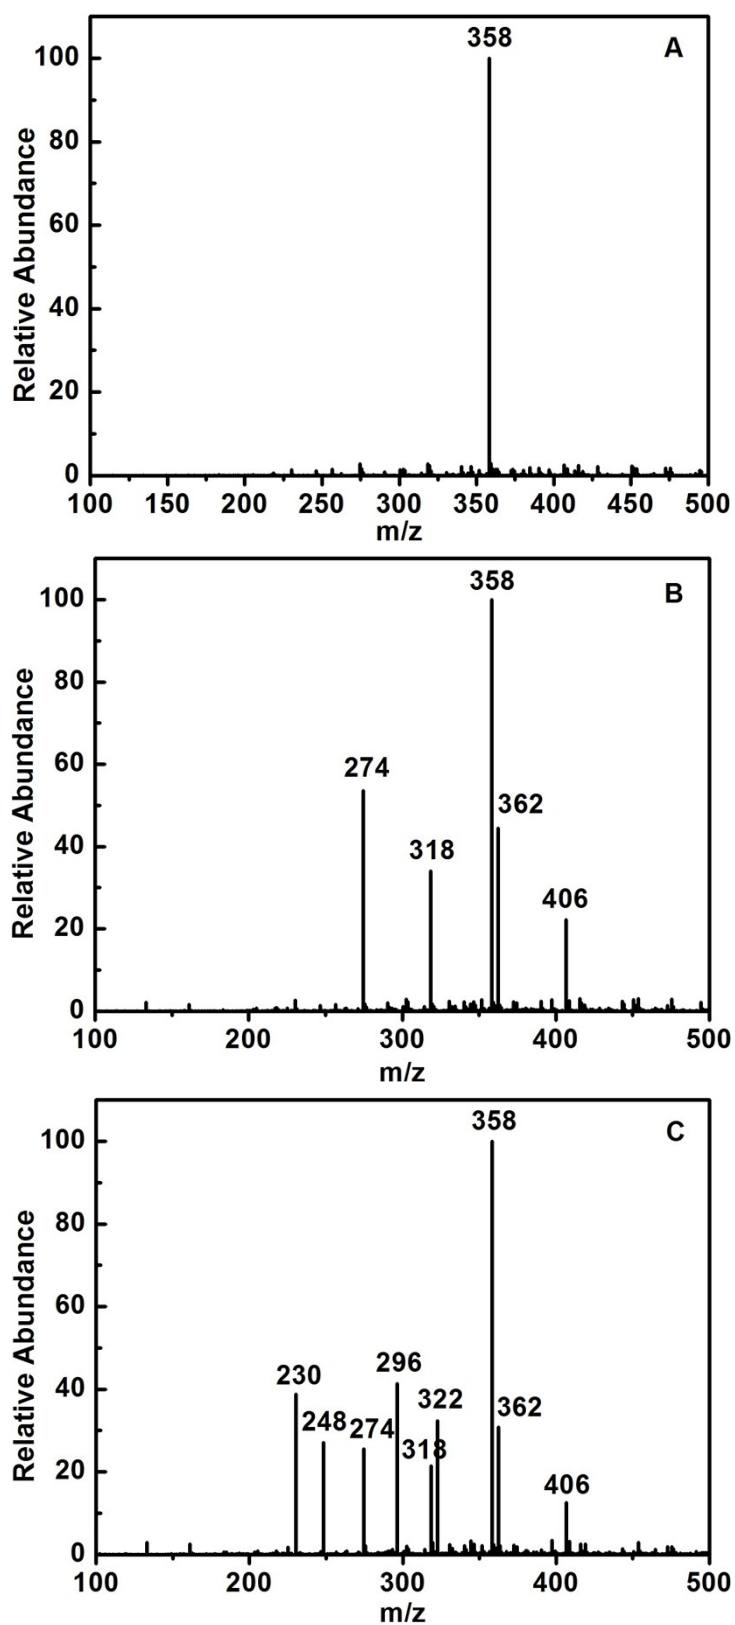

**Fig. S7** m/z of degraded danofloxacin mesylate with functional ZnO/C/Fe<sub>3</sub>O<sub>4</sub> (A. the initial danofloxacin mesylate aqueous solution, B. degradation of danofloxacin mesylate in 60 min, C. degradation of danofloxacin mesylate in 120 min)
